# Supplementary material
Source: PubMed Central journal article supplement (PMC11419567)
Supplement: NIHMS1990708-supplement-2.pdf [file NIHMS1990708-supplement-2.pdf]

# From Sparse to Dense: GPT-4 Summarization with Chain of Density Prompting

Griffin Adams<sup>♣♣</sup>  
griffin.adams@columbia.edu

Alexander R. Fabbri<sup>◇</sup>  
afabbri@salesforce.com

Faisal Ladhak<sup>♠</sup>  
faisal@cs.columbia.edu

Eric Lehman<sup>♥</sup>  
lehmer16@mit.edu

Noémie Elhadad<sup>♣♣</sup>  
noemie.elhadad@columbia.edu

Columbia University: CS<sup>♠</sup>, Biomedical Informatics<sup>♣</sup>    Salesforce AI<sup>◇</sup>    MIT<sup>♥</sup>

## A GPT-4 Metrics

For the GPT-4 Likert-style evaluation, we use the following prompt template.

Article: `{{Article}}`

Summary: `{{Summary}}`

Please rate the summary  
(1=worst to 5=best) with  
respect to `{{Dimension}}`.

`{{Definition}}`

Below, we present the definitions provided for each quality metric.

- **Informative:** An informative summary captures the important information in the article and presents it accurately and concisely.
- **Quality:** A high quality summary is comprehensible and understandable.
- **Coherence:** A coherent summary is well-structured and well-organized.
- **Attributable:** Is all the information in the summary fully attributable to the Article?
- **Overall Preference:** A good summary should convey the main ideas in the Article in a concise, logical, and coherent fashion.

The **Quality** and **Coherence** prompts do not include the Article in the prompt. These definitions were paraphrased from previous summarization annotation efforts: (??).

**Meta-Evaluation.** To compute the summary-level correlation, we first turned the preference data into a vector representing the number of times that summary received a first-placed vote. Table 1 demonstrates, unsurprisingly, that a prompt designed to capture

| Dimension    | Correlation  |
|--------------|--------------|
| Informative  | 0.215        |
| Quality      | 0.120        |
| Coherence    | 0.178        |
| Attributable | 0.245        |
| Overall      | <b>0.311</b> |

Table 1: Summary-Level Pearson Correlation coefficient between human preferences and GPT-4 Likert ratings.

overall summary rating has the highest summary-level Pearson correlation to overall preferences (31), yet overall correlations are still low.
